# Supplementary material for: Cardiometabolic Traits in Adult Twins: Heritability and BMI Impact with Age
Source: MDPI journal article supplement (doi:10.3390/nu15010164), 2022-12-29
Supplement: s1 [file s1]

**Supplementary Table S1 Assumptions testing of univariate SEM for BMI and cardiometabolic risk factors in full analysis population**

| Model           | ep | -2LL    | df   | AIC     | Δdf | P-values |
|-----------------|----|---------|------|---------|-----|----------|
| <b>BMI</b>      |    |         |      |         |     |          |
| Saturated model | 12 | 5769.18 | 2292 | 5793.18 |     |          |
| Submodel 1      | 10 | 5769.76 | 2294 | 5789.76 | 2   | 0.75     |
| Submodel 2      | 9  | 5769.86 | 2295 | 5787.86 | 3   | 0.88     |
| Submodel 3      | 7  | 5770.81 | 2297 | 5784.81 | 5   | 0.90     |
| Submodel 4      | 6  | 5778.61 | 2298 | 5790.61 | 6   | 0.15     |
| <b>HbA1c</b>    |    |         |      |         |     |          |
| Saturated model | 13 | 4780.46 | 1981 | 4806.46 |     |          |
| Submodel 1      | 11 | 4780.54 | 1983 | 4802.54 | 2   | 0.96     |
| Submodel 2      | 10 | 4781.81 | 1984 | 4801.81 | 3   | 0.72     |
| Submodel 3      | 8  | 4789.57 | 1986 | 4805.57 | 5   | 0.10     |
| Submodel 4      | 7  | 4794.30 | 1987 | 4808.30 | 6   | 0.03     |
| <b>FBG</b>      |    |         |      |         |     |          |
| Saturated model | 13 | 5435.68 | 2163 | 5461.68 |     |          |
| Submodel 1      | 11 | 5437.42 | 2165 | 5459.42 | 2   | 0.42     |
| Submodel 2      | 10 | 5438.19 | 2166 | 5458.19 | 3   | 0.48     |
| Submodel 3      | 8  | 5439.84 | 2168 | 5455.84 | 5   | 0.53     |
| Submodel 4      | 7  | 5452.15 | 2169 | 5466.15 | 6   | 0.01     |
| <b>SBP</b>      |    |         |      |         |     |          |
| Saturated model | 12 | 5730.01 | 2300 | 5754.01 |     |          |
| Submodel 1      | 10 | 5731.37 | 2302 | 5751.37 | 2   | 0.51     |
| Submodel 2      | 9  | 5732.20 | 2303 | 5750.20 | 3   | 0.54     |
| Submodel 3      | 7  | 5732.82 | 2305 | 5746.82 | 5   | 0.73     |
| Submodel 4      | 6  | 5738.12 | 2306 | 5750.12 | 6   | 0.23     |
| <b>DBP</b>      |    |         |      |         |     |          |
| Saturated model | 12 | 6013.08 | 2330 | 6037.08 |     |          |
| Submodel 1      | 10 | 6015.30 | 2332 | 6035.30 | 2   | 0.33     |
| Submodel 2      | 9  | 6015.74 | 2333 | 6033.74 | 3   | 0.45     |
| Submodel 3      | 7  | 6020.49 | 2335 | 6034.49 | 5   | 0.19     |
| Submodel 4      | 6  | 6022.53 | 2336 | 6034.53 | 6   | 0.15     |
| <b>TC</b>       |    |         |      |         |     |          |
| Saturated model | 13 | 5905.87 | 2247 | 5931.87 |     |          |
| Submodel 1      | 11 | 5906.36 | 2249 | 5928.36 | 2   | 0.78     |
| Submodel 2      | 10 | 5907.40 | 2250 | 5927.40 | 3   | 0.68     |
| Submodel 3      | 8  | 5909.50 | 2252 | 5925.50 | 5   | 0.60     |
| Submodel 4      | 7  | 5910.43 | 2253 | 5924.43 | 6   | 0.60     |
| <b>TG</b>       |    |         |      |         |     |          |
| Saturated model | 13 | 5972.11 | 2213 | 5998.11 |     |          |

| Model           | ep | -2LL    | df   | AIC     | Δdf | P-values |
|-----------------|----|---------|------|---------|-----|----------|
| Submodel 1      | 11 | 5972.70 | 2215 | 5994.70 | 2   | 0.74     |
| Submodel 2      | 10 | 5973.93 | 2216 | 5993.93 | 3   | 0.61     |
| Submodel 3      | 8  | 5975.18 | 2218 | 5991.18 | 5   | 0.69     |
| Submodel 4      | 7  | 5975.37 | 2219 | 5989.37 | 6   | 0.78     |
| <b>LDL-C</b>    |    |         |      |         |     |          |
| Saturated model | 13 | 6040.41 | 2253 | 6066.41 |     |          |
| Submodel 1      | 11 | 6040.72 | 2255 | 6062.72 | 2   | 0.86     |
| Submodel 2      | 10 | 6040.87 | 2256 | 6060.87 | 3   | 0.93     |
| Submodel 3      | 8  | 6049.44 | 2258 | 6065.44 | 5   | 0.11     |
| Submodel 4      | 7  | 6049.82 | 2259 | 6063.82 | 6   | 0.15     |
| <b>HDL-C</b>    |    |         |      |         |     |          |
| Saturated model | 13 | 5781.04 | 2251 | 5807.04 |     |          |
| Submodel 1      | 11 | 5781.20 | 2253 | 5803.20 | 2   | 0.92     |
| Submodel 2      | 10 | 5781.51 | 2254 | 5801.51 | 3   | 0.93     |
| Submodel 3      | 8  | 5783.00 | 2256 | 5799.00 | 5   | 0.86     |
| Submodel 4      | 7  | 5783.08 | 2257 | 5797.08 | 6   | 0.92     |

Abbreviations: BMI, body mass index; HbA1c, glycated hemoglobin; FBG, fasting blood glucose; SBP, systolic blood pressure; DBP, diastolic blood pressure; TC, total cholesterol; TG, plasma triglyceride; LDL-C, low-density lipoprotein-cholesterol; HDL-C, high-density lipoprotein-cholesterol.

\*ep, parameters that were free to be estimated; -2LL, negative log-likelihood; df, degrees of freedom; AIC, Akaike's Information Criteria, an alternative fit index. Lower values indicate better model fits; Δdf, the difference in degrees of freedom compared to the saturated model.

\*Saturated model, baseline models that estimate the variances and means separately for each twin in a pair and across zygosity; Submodel 1 equates means within twin pairs; Submodel 2 equates means across zygosity; Submodel 3 equates variances within twin pairs; Submodel 4 equates variances across zygosity.

## Supplementary Table S2 Twin correlations and 95%CI by zygosity from univariate SEM

|       | MZ              | DZ              |
|-------|-----------------|-----------------|
| BMI   | 0.70(0.67,0.74) | 0.39(0.30,0.48) |
| HbA1c | 0.52(0.46,0.57) | 0.32(0.22,0.42) |
| FBG   | 0.51(0.46,0.56) | 0.23(0.12,0.33) |
| SBP   | 0.57(0.52,0.61) | 0.33(0.23,0.42) |
| DBP   | 0.59(0.54,0.63) | 0.36(0.27,0.45) |
| TC    | 0.63(0.58,0.66) | 0.37(0.27,0.46) |
| TG    | 0.58(0.53,0.62) | 0.33(0.23,0.42) |
| LDL-C | 0.60(0.55,0.64) | 0.32(0.22,0.41) |
| HDL-C | 0.69(0.65,0.72) | 0.41(0.32,0.49) |

Abbreviations: MZ, monozygotic twins; DZ, dizygotic twins.

**Supplementary Table S3 Univariate SEM fits statistics for BMI and cardiometabolic risk factors in full analysis population**

| Model           | Comparison Model | ep | -2LL    | df   | AIC     | Δdf | P-values |
|-----------------|------------------|----|---------|------|---------|-----|----------|
| <b>BMI</b>      |                  |    |         |      |         |     |          |
| Saturated model |                  | 12 | 5769.18 | 2292 | 5793.18 |     |          |
| ACE             | Saturated model  | 7  | 5778.51 | 2297 | 5792.51 | 5   | 0.10     |
| AE              | ACE              | 6  | 5778.51 | 2298 | 5790.51 | 1   | 1.00     |
| CE              | ACE              | 6  | 5882.13 | 2298 | 5894.13 | 1   | <0.01    |
| E               | ACE              | 5  | 6394.94 | 2299 | 6404.94 | 2   | <0.01    |
| Hom             | AE               | 4  | 5790.83 | 2230 | 5798.83 | 2   | <0.01    |
| <b>HbA1c</b>    |                  |    |         |      |         |     |          |
| Saturated model |                  | 13 | 4780.46 | 1981 | 4806.46 |     |          |
| ACE             | Saturated model  | 8  | 4793.18 | 1986 | 4809.18 | 5   | 0.03     |
| AE              | ACE              | 7  | 4796.18 | 1987 | 4810.18 | 1   | 0.08     |
| CE              | ACE              | 7  | 4801.16 | 1987 | 4815.16 | 1   | 0.00     |
| E               | ACE              | 6  | 5031.75 | 1988 | 5043.75 | 2   | 0.00     |
| Hom             | ACE              | 5  | 4886.21 | 1989 | 4896.21 | 3   | <0.01    |
| <b>FBG</b>      |                  |    |         |      |         |     |          |
| Saturated model |                  | 13 | 5435.68 | 2163 | 5461.68 |     |          |
| ADE             | Saturated model  | 8  | 5451.38 | 2168 | 5467.38 | 5   | 0.01     |
| AE              | ADE              | 7  | 5451.60 | 2169 | 5465.60 | 1   | 0.64     |
| DE              | ADE              | 7  | 5466.19 | 2169 | 5480.19 | 1   | 0.00     |
| E               | ADE              | 6  | 5687.84 | 2170 | 5699.84 | 2   | 0.00     |
| Hom             | AE               | 5  | 5503.54 | 2171 | 5513.54 | 3   | <0.01    |
| <b>SBP</b>      |                  |    |         |      |         |     |          |
| Saturated model |                  | 12 | 5730.01 | 2300 | 5754.01 |     |          |
| ACE             | Saturated model  | 7  | 5737.41 | 2305 | 5751.41 | 5   | 0.19     |
| AE              | ACE              | 6  | 5739.88 | 2306 | 5751.88 | 1   | 0.12     |
| CE              | ACE              | 6  | 5754.85 | 2306 | 5766.85 | 1   | <0.01    |
| E               | ACE              | 5  | 6097.46 | 2307 | 6107.46 | 2   | <0.01    |
| Hom             | ACE              | 4  | 5783.07 | 2308 | 5791.07 | 3   | <0.01    |
| <b>DBP</b>      |                  |    |         |      |         |     |          |
| Saturated model |                  | 12 | 6013.08 | 2330 | 6037.08 |     |          |
| ACE             | Saturated model  | 7  | 6022.04 | 2335 | 6036.04 | 5   | 0.11     |
| AE              | ACE              | 6  | 6025.64 | 2336 | 6037.64 | 1   | 0.06     |
| CE              | ACE              | 6  | 6041.59 | 2336 | 6053.59 | 1   | <0.01    |
| E               | ACE              | 5  | 6418.32 | 2337 | 6428.32 | 2   | <0.01    |

| Model           | Comparison<br>n<br>Model | ep | -2LL    | df   | AIC     | $\Delta$ df | P-values |
|-----------------|--------------------------|----|---------|------|---------|-------------|----------|
| <b>TC</b>       |                          |    |         |      |         |             |          |
| Hom             | ACE                      | 4  | 6033.50 | 2338 | 6041.50 | 3           | 0.01     |
| Saturated model |                          | 13 | 5905.87 | 2247 | 5931.87 |             |          |
| ACE             | Saturated model          | 8  | 5909.50 | 2252 | 5925.50 | 5           | 0.60     |
| AE              | ACE                      | 7  | 5910.80 | 2253 | 5924.80 | 1           | 0.25     |
| CE              | ACE                      | 7  | 5945.69 | 2253 | 5959.69 | 1           | 0.00     |
| E               | ACE                      | 6  | 6363.97 | 2254 | 6375.97 | 2           | 0.00     |
| Hom             | AE                       | 5  | 5911.68 | 2255 | 5921.68 | 2           | 0.65     |
| <b>TG</b>       |                          |    |         |      |         |             |          |
| Saturated model |                          | 13 | 5972.11 | 2213 | 5998.11 |             |          |
| ACE             | Saturated model          | 8  | 5974.07 | 2218 | 5990.07 | 5           | 0.85     |
| AE              | ACE                      | 7  | 5974.75 | 2219 | 5988.75 | 1           | 0.41     |
| CE              | ACE                      | 7  | 6003.87 | 2219 | 6017.87 | 1           | 0.00     |
| E               | ACE                      | 6  | 6327.49 | 2220 | 6339.49 | 2           | 0.00     |
| Hom             | AE                       | 5  | 5974.77 | 2221 | 5984.77 | 2           | 0.99     |
| <b>LDL-C</b>    |                          |    |         |      |         |             |          |
| Saturated model |                          | 13 | 6040.41 | 2253 | 6066.41 |             |          |
| ACE             | Saturated model          | 8  | 6049.68 | 2258 | 6065.68 | 5           | 0.10     |
| AE              | ACE                      | 7  | 6049.90 | 2259 | 6063.90 | 1           | 0.64     |
| CE              | ACE                      | 7  | 6086.31 | 2259 | 6100.31 | 1           | 0.00     |
| E               | ACE                      | 6  | 6438.39 | 2260 | 6450.39 | 2           | 0.00     |
| Hom             | AE                       | 5  | 6049.95 | 2261 | 6059.95 | 2           | 0.97     |
| <b>HDL-C</b>    |                          |    |         |      |         |             |          |
| Saturated model |                          | 13 | 5781.04 | 2251 | 5807.04 |             |          |
| ACE             | Saturated model          | 8  | 5782.80 | 2256 | 5798.80 | 5           | 0.88     |
| AE              | ACE                      | 7  | 5784.78 | 2257 | 5798.78 | 1           | 0.16     |
| CE              | ACE                      | 7  | 5836.44 | 2257 | 5850.44 | 1           | 0.00     |
| E               | ACE                      | 6  | 6351.75 | 2258 | 6363.75 | 2           | 0.00     |
| Hom             | AE                       | 5  | 5786.54 | 2259 | 5796.54 | 2           | 0.41     |

Abbreviations: BMI, body mass index; HbA1c, glycated hemoglobin; FBG, fasting blood glucose; SBP, systolic blood pressure; DBP, diastolic blood pressure; TC, total cholesterol; TG, plasma triglyceride; LDL-C, low-density lipoprotein-cholesterol; HDL-C, high-density lipoprotein-cholesterol.

\*ep, parameters that were free to be estimated; -2LL, negative log-likelihood; df, degrees of freedom; AIC, Akaike's Information Criteria, an alternative fit index. Lower values indicate better model fits;  $\Delta$ df, the difference in degrees of freedom compared to the saturated model.



| <b>Model</b>    | <b>ep</b> | <b>-2LL</b> | <b>df</b> | <b>AIC</b> | <b>Δdf</b> | <b>P-values</b> |
|-----------------|-----------|-------------|-----------|------------|------------|-----------------|
| Saturated model | 13        | 2692.73     | 1143      | 2718.73    |            |                 |
| Submodel 1      | 11        | 2697.59     | 1145      | 2719.59    | 2          | 0.09            |
| Submodel 2      | 10        | 2699.51     | 1146      | 2719.51    | 3          | 0.08            |
| Submodel 3      | 8         | 2706.07     | 1148      | 2722.07    | 5          | 0.02            |
| Submodel 4      | 7         | 2708.40     | 1149      | 2722.40    | 6          | 0.02            |
| 50-60           |           |             |           |            |            |                 |
| Saturated model | 13        | 1230.87     | 465       | 1256.87    |            |                 |
| Submodel 1      | 11        | 1231.50     | 467       | 1253.50    | 2          | 0.73            |
| Submodel 2      | 10        | 1231.82     | 468       | 1251.82    | 3          | 0.81            |
| Submodel 3      | 8         | 1234.56     | 470       | 1250.56    | 5          | 0.59            |
| Submodel 4      | 7         | 1235.79     | 471       | 1249.79    | 6          | 0.55            |
| >60             |           |             |           |            |            |                 |
| Saturated model | 13        | 860.92      | 347       | 886.92     |            |                 |
| Submodel 1      | 11        | 862.47      | 349       | 884.47     | 2          | 0.46            |
| Submodel 2      | 10        | 862.47      | 350       | 882.47     | 3          | 0.67            |
| Submodel 3      | 8         | 864.25      | 352       | 880.25     | 5          | 0.65            |
| Submodel 4      | 7         | 864.51      | 353       | 878.51     | 6          | 0.73            |
| <b>FBG</b>      |           |             |           |            |            |                 |
| 18-50           |           |             |           |            |            |                 |
| Saturated model | 13        | 3297.24     | 1285      | 3323.24    |            |                 |
| Submodel 1      | 11        | 3299.71     | 1287      | 3321.71    | 2          | 0.29            |
| Submodel 2      | 10        | 3299.98     | 1288      | 3319.98    | 3          | 0.43            |
| Submodel 3      | 8         | 3305.64     | 1290      | 3321.64    | 5          | 0.14            |
| Submodel 4      | 7         | 3307.53     | 1291      | 3321.53    | 6          | 0.11            |
| 50-60           |           |             |           |            |            |                 |
| Saturated model | 13        | 1301.62     | 511       | 1327.62    |            |                 |
| Submodel 1      | 11        | 1303.99     | 513       | 1325.99    | 2          | 0.30            |
| Submodel 2      | 10        | 1307.37     | 514       | 1327.37    | 3          | 0.12            |
| Submodel 3      | 8         | 1312.65     | 516       | 1328.65    | 5          | 0.05            |
| Submodel 4      | 7         | 1321.75     | 517       | 1335.75    | 6          | 0.00            |
| >60             |           |             |           |            |            |                 |
| Saturated model | 13        | 867.25      | 341       | 893.25     |            |                 |
| Submodel 1      | 11        | 868.17      | 343       | 890.17     | 2          | 0.63            |
| Submodel 2      | 10        | 868.61      | 344       | 888.61     | 3          | 0.72            |
| Submodel 3      | 8         | 872.94      | 346       | 888.94     | 5          | 0.34            |
| Submodel 4      | 7         | 873.18      | 347       | 887.18     | 6          | 0.43            |
| <b>SBP</b>      |           |             |           |            |            |                 |
| 18-50           |           |             |           |            |            |                 |
| Saturated model | 12        | 3394.79     | 1350      | 3418.79    |            |                 |
| Submodel 1      | 10        | 3396.95     | 1352      | 3416.95    | 2          | 0.34            |
| Submodel 2      | 9         | 3397.30     | 1353      | 3415.30    | 3          | 0.47            |

| <b>Model</b>    | <b>ep</b> | <b>-2LL</b> | <b>df</b> | <b>AIC</b> | <b>Δdf</b> | <b>P-values</b> |
|-----------------|-----------|-------------|-----------|------------|------------|-----------------|
| Submodel 3      | 7         | 3397.63     | 1355      | 3411.63    | 5          | 0.72            |
| Submodel 4      | 6         | 3400.66     | 1356      | 3412.66    | 6          | 0.44            |
| <b>50-60</b>    |           |             |           |            |            |                 |
| Saturated model | 12        | 1539.17     | 568       | 1563.17    |            |                 |
| Submodel 1      | 10        | 1539.65     | 570       | 1559.65    | 2          | 0.78            |
| Submodel 2      | 9         | 1539.89     | 571       | 1557.89    | 3          | 0.87            |
| Submodel 3      | 7         | 1540.82     | 573       | 1554.82    | 5          | 0.90            |
| Submodel 4      | 6         | 1540.83     | 574       | 1552.83    | 6          | 0.95            |
| <b>&gt;60</b>   |           |             |           |            |            |                 |
| Saturated model | 12        | 1010.51     | 358       | 1034.51    |            |                 |
| Submodel 1      | 10        | 1010.61     | 360       | 1030.61    | 2          | 0.95            |
| Submodel 2      | 9         | 1013.74     | 361       | 1031.74    | 3          | 0.36            |
| Submodel 3      | 7         | 1014.39     | 363       | 1028.39    | 5          | 0.57            |
| Submodel 4      | 6         | 1015.20     | 364       | 1027.20    | 6          | 0.58            |
| <b>DBP</b>      |           |             |           |            |            |                 |
| <b>18-50</b>    |           |             |           |            |            |                 |
| Saturated model | 12        | 3400.08     | 1348      | 3424.08    |            |                 |
| Submodel 1      | 10        | 3401.19     | 1350      | 3421.19    | 2          | 0.57            |
| Submodel 2      | 9         | 3401.19     | 1351      | 3419.19    | 3          | 0.77            |
| Submodel 3      | 7         | 3404.64     | 1353      | 3418.64    | 5          | 0.47            |
| Submodel 4      | 6         | 3408.41     | 1354      | 3420.41    | 6          | 0.21            |
| <b>50-60</b>    |           |             |           |            |            |                 |
| Saturated model | 12        | 1583.29     | 584       | 1607.29    |            |                 |
| Submodel 1      | 10        | 1585.51     | 586       | 1605.51    | 2          | 0.33            |
| Submodel 2      | 9         | 1585.57     | 587       | 1603.57    | 3          | 0.51            |
| Submodel 3      | 7         | 1588.26     | 589       | 1602.26    | 5          | 0.42            |
| Submodel 4      | 6         | 1588.36     | 590       | 1600.36    | 6          | 0.53            |
| <b>&gt;60</b>   |           |             |           |            |            |                 |
| Saturated model | 12        | 1023.39     | 374       | 1047.39    |            |                 |
| Submodel 1      | 10        | 1023.50     | 376       | 1043.50    | 2          | 0.94            |
| Submodel 2      | 9         | 1025.62     | 377       | 1043.62    | 3          | 0.53            |
| Submodel 3      | 7         | 1026.76     | 379       | 1040.76    | 5          | 0.64            |
| Submodel 4      | 6         | 1026.76     | 380       | 1038.76    | 6          | 0.76            |
| <b>TC</b>       |           |             |           |            |            |                 |
| <b>18-50</b>    |           |             |           |            |            |                 |
| Saturated model | 13        | 3389.12     | 1309      | 3415.12    |            |                 |
| Submodel 1      | 11        | 3389.25     | 1311      | 3411.25    | 2          | 0.94            |
| Submodel 2      | 10        | 3389.48     | 1312      | 3409.48    | 3          | 0.95            |
| Submodel 3      | 8         | 3390.64     | 1314      | 3406.64    | 5          | 0.91            |
| Submodel 4      | 7         | 3390.73     | 1315      | 3404.73    | 6          | 0.95            |
| <b>50-60</b>    |           |             |           |            |            |                 |
| Saturated       | 13        | 1500.63     | 553       | 1526.63    |            |                 |

| Model           | ep | -2LL    | df   | AIC     | Δdf | P-values |
|-----------------|----|---------|------|---------|-----|----------|
| model           |    |         |      |         |     |          |
| Submodel 1      | 11 | 1500.73 | 555  | 1522.73 | 2   | 0.95     |
| Submodel 2      | 10 | 1505.10 | 556  | 1525.10 | 3   | 0.21     |
| Submodel 3      | 8  | 1506.08 | 558  | 1522.08 | 5   | 0.36     |
| Submodel 4      | 7  | 1506.35 | 559  | 1520.35 | 6   | 0.45     |
| >60             |    |         |      |         |     |          |
| Saturated model | 13 | 972.44  | 359  | 998.44  |     |          |
| Submodel 1      | 11 | 972.88  | 361  | 994.88  | 2   | 0.80     |
| Submodel 2      | 10 | 974.04  | 362  | 994.04  | 3   | 0.66     |
| Submodel 3      | 8  | 975.72  | 364  | 991.72  | 5   | 0.66     |
| Submodel 4      | 7  | 978.17  | 365  | 992.17  | 6   | 0.45     |
| <b>TG</b>       |    |         |      |         |     |          |
| 18-50           |    |         |      |         |     |          |
| Saturated model | 13 | 3372.28 | 1281 | 3398.28 |     |          |
| Submodel 1      | 11 | 3374.21 | 1283 | 3396.21 | 2   | 0.38     |
| Submodel 2      | 10 | 3374.22 | 1284 | 3394.22 | 3   | 0.59     |
| Submodel 3      | 8  | 3375.70 | 1286 | 3391.70 | 5   | 0.64     |
| Submodel 4      | 7  | 3375.72 | 1287 | 3389.72 | 6   | 0.75     |
| 50-60           |    |         |      |         |     |          |
| Saturated model | 13 | 1537.57 | 549  | 1563.57 |     |          |
| Submodel 1      | 11 | 1541.33 | 551  | 1563.33 | 2   | 0.15     |
| Submodel 2      | 10 | 1546.08 | 552  | 1566.08 | 3   | 0.04     |
| Submodel 3      | 8  | 1549.58 | 554  | 1565.58 | 5   | 0.03     |
| Submodel 4      | 7  | 1549.78 | 555  | 1563.78 | 6   | 0.06     |
| >60             |    |         |      |         |     |          |
| Saturated model | 13 | 992.06  | 357  | 1018.06 |     |          |
| Submodel 1      | 11 | 996.10  | 359  | 1018.10 | 2   | 0.13     |
| Submodel 2      | 10 | 996.11  | 360  | 1016.11 | 3   | 0.26     |
| Submodel 3      | 8  | 999.64  | 362  | 1015.64 | 5   | 0.18     |
| Submodel 4      | 7  | 1000.04 | 363  | 1014.04 | 6   | 0.24     |
| <b>LDL-C</b>    |    |         |      |         |     |          |
| 18-50           |    |         |      |         |     |          |
| Saturated model | 13 | 3481.90 | 1319 | 3507.90 |     |          |
| Submodel 1      | 11 | 3482.61 | 1321 | 3504.61 | 2   | 0.70     |
| Submodel 2      | 10 | 3482.73 | 1322 | 3502.73 | 3   | 0.84     |
| Submodel 3      | 8  | 3492.72 | 1324 | 3508.72 | 5   | 0.06     |
| Submodel 4      | 7  | 3492.92 | 1325 | 3506.92 | 6   | 0.09     |
| 50-60           |    |         |      |         |     |          |
| Saturated model | 13 | 1551.64 | 555  | 1577.64 |     |          |
| Submodel 1      | 11 | 1552.26 | 557  | 1574.26 | 2   | 0.73     |
| Submodel 2      | 10 | 1552.26 | 558  | 1572.26 | 3   | 0.89     |
| Submodel 3      | 8  | 1554.20 | 560  | 1570.20 | 5   | 0.77     |



| Model           | ep | -2LL    | df   | AIC     | Δdf | P-values |
|-----------------|----|---------|------|---------|-----|----------|
| Submodel 4      | 7  | 1554.35 | 561  | 1568.35 | 6   | 0.84     |
| >60             |    |         |      |         |     |          |
| Saturated model | 13 | 975.64  | 353  | 1001.64 |     |          |
| Submodel 1      | 11 | 977.29  | 355  | 999.29  | 2   | 0.44     |
| Submodel 2      | 10 | 977.35  | 356  | 997.35  | 3   | 0.63     |
| Submodel 3      | 8  | 978.66  | 358  | 994.66  | 5   | 0.70     |
| Submodel 4      | 7  | 979.15  | 359  | 993.15  | 6   | 0.74     |
| <b>HDL-C</b>    |    |         |      |         |     |          |
| 18-50           |    |         |      |         |     |          |
| Saturated model | 13 | 3381.07 | 1315 | 3407.07 |     |          |
| Submodel 1      | 11 | 3381.34 | 1317 | 3403.34 | 2   | 0.87     |
| Submodel 2      | 10 | 3381.50 | 1318 | 3401.50 | 3   | 0.93     |
| Submodel 3      | 8  | 3385.59 | 1320 | 3401.59 | 5   | 0.48     |
| Submodel 4      | 7  | 3385.63 | 1321 | 3399.63 | 6   | 0.60     |
| 50-60           |    |         |      |         |     |          |
| Saturated model | 13 | 1486.35 | 557  | 1512.35 |     |          |
| Submodel 1      | 11 | 1486.84 | 559  | 1508.84 | 2   | 0.78     |
| Submodel 2      | 10 | 1487.31 | 560  | 1507.31 | 3   | 0.81     |
| Submodel 3      | 8  | 1487.79 | 562  | 1503.79 | 5   | 0.92     |
| Submodel 4      | 7  | 1487.80 | 563  | 1501.80 | 6   | 0.96     |
| >60             |    |         |      |         |     |          |
| Saturated model | 13 | 913.91  | 353  | 939.91  |     |          |
| Submodel 1      | 11 | 915.10  | 355  | 937.10  | 2   | 0.55     |
| Submodel 2      | 10 | 918.21  | 356  | 938.21  | 3   | 0.23     |
| Submodel 3      | 8  | 919.40  | 358  | 935.40  | 5   | 0.36     |
| Submodel 4      | 7  | 919.46  | 359  | 933.46  | 6   | 0.47     |

Abbreviations: BMI, body mass index; HbA1c, glycated hemoglobin; FBG, fasting blood glucose; SBP, systolic blood pressure; DBP, diastolic blood pressure; TC, total cholesterol; TG, plasma triglyceride; LDL-C, low-density lipoprotein-cholesterol; HDL-C, high-density lipoprotein-cholesterol.

\*ep, parameters that were free to be estimated; -2LL, negative log-likelihood; df, degrees of freedom; AIC, Akaike's Information Criteria, an alternative fit index. Lower values indicate better model fits; Δdf, the difference in degrees of freedom compared to the saturated model.

\*Saturated model, baseline models that estimate the variances and means separately for each twin in a pair and across zygosity; Submodel 1 equates means within twin pairs; Submodel 2 equates means across zygosity; Submodel 3 equates variances within twin pairs; Submodel 4 equates variances across zygosity.

### **Supplementary Table S6 Twin correlations and 95%CI by zygosity from univariate SEM by age groups**

|              | MZ              | DZ              |
|--------------|-----------------|-----------------|
| <b>BMI</b>   |                 |                 |
| 18-50        | 0.72(0.67,0.76) | 0.41(0.29,0.51) |
| 50-60        | 0.66(0.58,0.73) | 0.32(0.11,0.50) |
| >60          | 0.61(0.50,0.70) | 0.23(0.00,0.48) |
| <b>HbA1c</b> |                 |                 |
| 18-50        | 0.68(0.62,0.73) | 0.37(0.24,0.49) |
| 50-60        | 0.33(0.18,0.46) | 0.29(0.05,0.49) |
| >60          | 0.34(0.18,0.48) | 0.17(0.00,0.43) |
| <b>FBG</b>   |                 |                 |
| 18-50        | 0.55(0.48,0.61) | 0.33(0.20,0.44) |
| 50-60        | 0.48(0.36,0.59) | 0.07(0.00,0.30) |
| >60          | 0.42(0.24,0.54) | 0.09(0.00,0.39) |
| <b>SBP</b>   |                 |                 |
| 18-50        | 0.63(0.57,0.68) | 0.32(0.19,0.43) |
| 50-60        | 0.56(0.47,0.65) | 0.33(0.12,0.50) |
| >60          | 0.42(0.28,0.53) | 0.41(0.08,0.62) |
| <b>DBP</b>   |                 |                 |
| 18-50        | 0.59(0.53,0.65) | 0.30(0.17,0.41) |
| 50-60        | 0.56(0.46,0.64) | 0.45(0.27,0.59) |
| >60          | 0.53(0.40,0.63) | 0.25(0.00,0.48) |
| <b>TC</b>    |                 |                 |
| 18-50        | 0.67(0.62,0.71) | 0.33(0.21,0.44) |
| 50-60        | 0.59(0.47,0.68) | 0.28(0.00,0.53) |
| >60          | 0.59(0.47,0.68) | 0.25(0.00,0.51) |
| <b>TG</b>    |                 |                 |
| 18-50        | 0.61(0.55,0.66) | 0.35(0.23,0.46) |
| 50-60        | 0.51(0.40,0.60) | 0.14(0.00,0.35) |
| >60          | 0.47(0.32,0.58) | 0.24(0.00,0.47) |
| <b>LDL-C</b> |                 |                 |
| 18-50        | 0.66(0.60,0.71) | 0.27(0.14,0.39) |
| 50-60        | 0.46(0.35,0.56) | 0.41(0.21,0.57) |
| >60          | 0.55(0.43,0.65) | 0.37(0.05,0.58) |
| <b>HDL-C</b> |                 |                 |
| 18-50        | 0.71(0.66,0.75) | 0.41(0.29,0.51) |
| 50-60        | 0.62(0.53,0.69) | 0.45(0.26,0.59) |
| >60          | 0.69(0.60,0.77) | 0.27(0.00,0.51) |

Abbreviations: MZ, monozygotic twins; DZ, dizygotic twins.

**Supplementary Table S7 Univariate SEM fits statistics for BMI and cardiometabolic risk factors by age group**

| Model           | Comparison Model | ep | -2LL    | df   | AIC     | Δdf | P-values |
|-----------------|------------------|----|---------|------|---------|-----|----------|
| <b>BMI</b>      |                  |    |         |      |         |     |          |
| 18-50           |                  |    |         |      |         |     |          |
| Saturated model |                  | 12 | 3354.66 | 1338 | 3378.66 |     |          |
| ACE             | Saturated model  | 7  | 3361.64 | 1343 | 3375.64 | 5   | 0.22     |

| Model           | Comparison Model | ep | -2LL    | df   | AIC     | Δdf | P-values |
|-----------------|------------------|----|---------|------|---------|-----|----------|
| AE              | ACE              | 6  | 3361.67 | 1344 | 3373.67 | 1   | 0.86     |
| CE              | ACE              | 6  | 3426.57 | 1344 | 3438.57 | 1   | <0.01    |
| E               | ACE              | 5  | 3735.45 | 1345 | 3745.45 | 2   | <0.01    |
| 50-60           |                  |    |         |      |         |     |          |
| Saturated model |                  | 12 | 1473.93 | 572  | 1497.93 |     |          |
| ACE             | Saturated model  | 7  | 1480.77 | 577  | 1494.77 | 5   | 0.23     |
| AE              | ACE              | 6  | 1481.36 | 578  | 1493.36 | 1   | 0.44     |
| CE              | ACE              | 6  | 1482.13 | 578  | 1494.13 | 1   | 0.24     |
| E               | ACE              | 5  | 1612.91 | 579  | 1622.91 | 2   | <0.01    |
| >60             |                  |    |         |      |         |     |          |
| Saturated model |                  | 12 | 929.73  | 358  | 953.73  |     |          |
| ADE             | Saturated model  | 7  | 931.19  | 363  | 945.19  | 5   | 0.92     |
| AE              | ADE              | 6  | 931.65  | 364  | 943.65  | 1   | 0.50     |
| DE              | ADE              | 6  | 931.32  | 364  | 943.32  | 1   | 0.73     |
| E               | ADE              | 5  | 999.55  | 365  | 1009.55 | 2   | <0.01    |
| <b>HbA1c</b>    |                  |    |         |      |         |     |          |
| 18-50           |                  |    |         |      |         |     |          |
| Saturated model |                  | 13 | 2692.73 | 1143 | 2718.73 |     |          |
| ACE             | Saturated model  | 8  | 2706.91 | 1148 | 2722.91 | 5   | 0.01     |
| AE              | ACE              | 7  | 2707.84 | 1149 | 2721.84 | 1   | 0.33     |
| CE              | ACE              | 7  | 2730.58 | 1149 | 2744.58 | 1   | 0.00     |
| E               | ACE              | 6  | 2961.04 | 1150 | 2973.04 | 2   | 0.00     |
| 50-60           |                  |    |         |      |         |     |          |
| Saturated model |                  | 13 | 1230.87 | 465  | 1256.87 |     |          |
| ACE             | Saturated model  | 8  | 1235.48 | 470  | 1251.48 | 5   | 0.47     |
| AE              | ACE              | 7  | 1236.95 | 471  | 1250.95 | 1   | 0.22     |
| CE              | ACE              | 7  | 1235.48 | 471  | 1249.48 | 1   | 1.00     |
| E               | ACE              | 6  | 1259.63 | 472  | 1271.63 | 2   | 0.00     |
| >60             |                  |    |         |      |         |     |          |
| Saturated model |                  | 13 | 860.92  | 347  | 886.92  |     |          |
| ACE             | Saturated model  | 8  | 864.48  | 352  | 880.48  | 5   | 0.61     |
| AE              | ACE              | 7  | 864.48  | 353  | 878.48  | 1   | 0.99     |
| CE              | ACE              | 7  | 865.68  | 353  | 879.68  | 1   | 0.27     |
| E               | ACE              | 6  | 881.68  | 354  | 893.68  | 2   | 0.00     |
| <b>FBG</b>      |                  |    |         |      |         |     |          |
| 18-50           |                  |    |         |      |         |     |          |
| Saturated model |                  | 13 | 3297.24 | 1285 | 3323.24 |     |          |

| Model           | Comparison Model | ep | -2LL    | df   | AIC     | Δdf | P-values |
|-----------------|------------------|----|---------|------|---------|-----|----------|
| ACE             | Saturated model  | 8  | 3307.18 | 1290 | 3323.18 | 5   | 0.08     |
| AE              | ACE              | 7  | 3308.74 | 1291 | 3322.74 | 1   | 0.21     |
| CE              | ACE              | 7  | 3315.90 | 1291 | 3329.90 | 1   | 0.00     |
| E               | ACE              | 6  | 3479.23 | 1292 | 3491.23 | 2   | 0.00     |
| 50-60           |                  |    |         |      |         |     |          |
| Saturated model |                  | 13 | 1301.62 | 511  | 1327.62 |     |          |
| ADE             | Saturated model  | 8  | 1320.04 | 516  | 1336.04 | 5   | 0.00     |
| AE              | ADE              | 7  | 1320.04 | 517  | 1334.04 | 1   | 1.00     |
| DE              | ADE              | 7  | 1324.42 | 517  | 1338.42 | 1   | 0.04     |
| E               | ACE              | 6  | 1365.03 | 518  | 1377.03 | 2   | 0.00     |
| >60             |                  |    |         |      |         |     |          |
| Saturated model |                  | 13 | 867.25  | 341  | 893.25  |     |          |
| ADE             | Saturated model  | 8  | 873.14  | 346  | 889.14  | 5   | 0.32     |
| AE              | ADE              | 7  | 873.14  | 347  | 887.14  | 1   | 1.00     |
| DE              | ADE              | 7  | 876.50  | 347  | 890.50  | 1   | 0.07     |
| E               | ADE              | 6  | 898.61  | 348  | 910.61  | 2   | 0.00     |
| <b>SBP</b>      |                  |    |         |      |         |     |          |
| 18-50           |                  |    |         |      |         |     |          |
| Saturated model |                  | 12 | 3394.79 | 1350 | 3418.79 |     |          |
| ACE             | Saturated model  | 7  | 3400.30 | 1355 | 3414.30 | 5   | 0.36     |
| AE              | ACE              | 6  | 3400.67 | 1356 | 3412.67 | 1   | 0.54     |
| CE              | ACE              | 6  | 3422.72 | 1356 | 3434.72 | 1   | <0.01    |
| E               | ACE              | 5  | 3654.46 | 1357 | 3664.46 | 2   | <0.01    |
| 50-60           |                  |    |         |      |         |     |          |
| Saturated model |                  | 12 | 1539.17 | 568  | 1563.17 |     |          |
| ACE             | Saturated model  | 7  | 1540.56 | 573  | 1554.56 | 5   | 0.93     |
| AE              | ACE              | 6  | 1540.78 | 574  | 1552.78 | 1   | 0.64     |
| CE              | ACE              | 6  | 1547.03 | 574  | 1559.03 | 1   | 0.01     |
| E               | ACE              | 5  | 1630.29 | 575  | 1640.29 | 2   | <0.01    |
| >60             |                  |    |         |      |         |     |          |
| Saturated model |                  | 12 | 1010.51 | 358  | 1034.51 |     |          |
| ACE             | Saturated model  | 7  | 1012.51 | 363  | 1026.51 | 5   | 0.85     |
| AE              | ACE              | 6  | 1013.82 | 364  | 1025.82 | 1   | 0.25     |
| CE              | ACE              | 6  | 1012.52 | 364  | 1024.52 | 1   | 0.90     |
| E               | ACE              | 5  | 1046.19 | 365  | 1056.19 | 2   | <0.01    |
| <b>DBP</b>      |                  |    |         |      |         |     |          |
| 18-50           |                  |    |         |      |         |     |          |

| Model           | Comparison Model | ep | -2LL    | df   | AIC     | Δdf | P-values |
|-----------------|------------------|----|---------|------|---------|-----|----------|
| <b>50-60</b>    |                  |    |         |      |         |     |          |
| Saturated model |                  | 12 | 3400.08 | 1348 | 3424.08 |     |          |
| ACE             | Saturated model  | 7  | 3408.41 | 1353 | 3422.41 | 5   | 0.14     |
| AE              | ACE              | 6  | 3408.79 | 1354 | 3420.79 | 1   | 0.53     |
| CE              | ACE              | 6  | 3425.73 | 1354 | 3437.73 | 1   | <0.01    |
| E               | ACE              | 5  | 3629.02 | 1355 | 3639.02 | 2   | <0.01    |
| <b>&gt;60</b>   |                  |    |         |      |         |     |          |
| Saturated model |                  | 12 | 1583.29 | 584  | 1607.29 |     |          |
| ACE             | Saturated model  | 7  | 1588.34 | 589  | 1602.34 | 5   | 0.41     |
| AE              | ACE              | 6  | 1591.71 | 590  | 1603.71 | 1   | 0.07     |
| CE              | ACE              | 6  | 1590.04 | 590  | 1602.04 | 1   | 0.19     |
| E               | ACE              | 5  | 1687.33 | 591  | 1697.33 | 2   | <0.01    |
| <b>TC</b>       |                  |    |         |      |         |     |          |
| <b>18-50</b>    |                  |    |         |      |         |     |          |
| Saturated model |                  | 13 | 3389.12 | 1309 | 3415.12 |     |          |
| ADE             | Saturated model  | 8  | 3390.52 | 1314 | 3406.52 | 5   | 0.92     |
| AE              | ADE              | 7  | 3390.52 | 1315 | 3404.52 | 1   | 1.00     |
| DE              | ADE              | 7  | 3431.41 | 1315 | 3445.41 | 1   | 0.00     |
| E               | ADE              | 6  | 3680.79 | 1316 | 3692.79 | 2   | 0.00     |
| <b>50-60</b>    |                  |    |         |      |         |     |          |
| Saturated model |                  | 13 | 1500.63 | 553  | 1526.63 |     |          |
| ACE             | Saturated model  | 8  | 1502.28 | 558  | 1518.28 | 5   | 0.90     |
| AE              | ACE              | 7  | 1504.51 | 559  | 1518.51 | 1   | 0.13     |
| CE              | ACE              | 7  | 1503.91 | 559  | 1517.91 | 1   | 0.20     |
| E               | ACE              | 6  | 1589.86 | 560  | 1601.86 | 2   | 0.00     |
| <b>&gt;60</b>   |                  |    |         |      |         |     |          |
| Saturated model |                  | 13 | 972.44  | 359  | 998.44  |     |          |
| ADE             | Saturated model  | 8  | 977.09  | 364  | 993.09  | 5   | 0.46     |
| AE              | ADE              | 7  | 977.23  | 365  | 991.23  | 1   | 0.71     |
| DE              | ADE              | 7  | 979.76  | 365  | 993.76  | 1   | 0.10     |
| E               | ADE              | 6  | 1041.36 | 366  | 1053.36 | 2   | 0.00     |

| Model           | Comparison Model | ep | -2LL    | df   | AIC     | Δdf | P-values |
|-----------------|------------------|----|---------|------|---------|-----|----------|
| <b>TG</b>       |                  |    |         |      |         |     |          |
| 18-50           |                  |    |         |      |         |     |          |
| Saturated model |                  | 13 | 3372.28 | 1281 | 3398.28 |     |          |
| ACE             | Saturated model  | 8  | 3375.70 | 1286 | 3391.70 | 5   | 0.64     |
| AE              | ACE              | 7  | 3376.29 | 1287 | 3390.29 | 1   | 0.44     |
| CE              | ACE              | 7  | 3396.44 | 1287 | 3410.44 | 1   | 0.00     |
| E               | ACE              | 6  | 3604.39 | 1288 | 3616.39 | 2   | 0.00     |
| 50-60           |                  |    |         |      |         |     |          |
| Saturated model |                  | 13 | 1537.57 | 549  | 1563.57 |     |          |
| ADE             | Saturated model  | 8  | 1545.03 | 554  | 1561.03 | 5   | 0.19     |
| AE              | ADE              | 7  | 1545.03 | 555  | 1559.03 | 1   | 1.00     |
| DE              | ADE              | 7  | 1554.17 | 555  | 1568.17 | 1   | 0.00     |
| E               | ADE              | 6  | 1605.31 | 556  | 1617.31 | 2   | 0.00     |
| >60             |                  |    |         |      |         |     |          |
| Saturated model |                  | 13 | 992.06  | 357  | 1018.06 |     |          |
| ACE             | Saturated model  | 8  | 1000.04 | 362  | 1016.04 | 5   | 0.16     |
| AE              | ACE              | 7  | 1000.04 | 363  | 1014.04 | 1   | 0.97     |
| CE              | ACE              | 7  | 1002.81 | 363  | 1016.81 | 1   | 0.10     |
| E               | ACE              | 6  | 1035.88 | 364  | 1047.88 | 2   | 0.00     |
| <b>LDL-C</b>    |                  |    |         |      |         |     |          |
| 18-50           |                  |    |         |      |         |     |          |
| Saturated model |                  | 13 | 3481.90 | 1319 | 3507.90 |     |          |
| ADE             | Saturated model  | 8  | 3493.72 | 1324 | 3509.72 | 5   | 0.04     |
| AE              | ADE              | 7  | 3493.72 | 1325 | 3507.72 | 1   | 1.00     |
| DE              | ADE              | 7  | 3539.21 | 1325 | 3553.21 | 1   | 0.00     |
| E               | ADE              | 6  | 3762.49 | 1326 | 3774.49 | 2   | 0.00     |
| 50-60           |                  |    |         |      |         |     |          |
| Saturated model |                  | 13 | 1551.64 | 555  | 1577.64 |     |          |
| ACE             | Saturated model  | 8  | 1554.34 | 560  | 1570.34 | 5   | 0.75     |
| AE              | ACE              | 7  | 1557.06 | 561  | 1571.06 | 1   | 0.10     |
| CE              | ACE              | 7  | 1554.90 | 561  | 1568.90 | 1   | 0.45     |
| E               | ACE              | 6  | 1617.54 | 562  | 1629.54 | 2   | 0.00     |
| >60             |                  |    |         |      |         |     |          |
| Saturated model |                  | 13 | 975.64  | 353  | 1001.64 |     |          |
| ACE             | Saturated model  | 8  | 979.04  | 358  | 995.04  | 5   | 0.64     |
| AE              | ACE              | 7  | 979.40  | 359  | 993.40  | 1   | 0.55     |

| Model           | Comparison Model | ep | -2LL    | df   | AIC     | Δdf | P-values |
|-----------------|------------------|----|---------|------|---------|-----|----------|
| CE              | ACE              | 7  | 981.23  | 359  | 995.23  | 1   | 0.14     |
| E               | ACE              | 6  | 1037.88 | 360  | 1049.88 | 2   | 0.00     |
| <b>HDL-C</b>    |                  |    |         |      |         |     |          |
| 18-50           |                  |    |         |      |         |     |          |
| Saturated model |                  | 13 | 3381.07 | 1315 | 3407.07 |     |          |
| ACE             | Saturated model  | 8  | 3385.49 | 1320 | 3401.49 | 5   | 0.49     |
| AE              | ACE              | 7  | 3386.40 | 1321 | 3400.40 | 1   | 0.34     |
| CE              | ACE              | 7  | 3425.59 | 1321 | 3439.59 | 1   | 0.00     |
| E               | ACE              | 6  | 3738.58 | 1322 | 3750.58 | 2   | 0.00     |
| 50-60           |                  |    |         |      |         |     |          |
| Saturated model |                  | 13 | 1486.35 | 557  | 1512.35 |     |          |
| ACE             | Saturated model  | 8  | 1487.32 | 562  | 1503.32 | 5   | 0.97     |
| AE              | ACE              | 7  | 1489.42 | 563  | 1503.42 | 1   | 0.15     |
| CE              | ACE              | 7  | 1491.87 | 563  | 1505.87 | 1   | 0.03     |
| E               | ACE              | 6  | 1603.60 | 564  | 1615.60 | 2   | 0.00     |
| >60             |                  |    |         |      |         |     |          |
| Saturated model |                  | 13 | 913.91  | 353  | 939.91  |     |          |
| ADE             | Saturated model  | 8  | 917.46  | 358  | 933.46  | 5   | 0.62     |
| AE              | ADE              | 7  | 917.46  | 359  | 931.46  | 1   | 1.00     |
| DE              | ADE              | 7  | 931.60  | 359  | 945.60  | 1   | 0.00     |
| E               | ADE              | 6  | 1010.94 | 360  | 1022.94 | 2   | 0.00     |

Abbreviations: BMI, body mass index; HbA1c, glycated hemoglobin; FBG, fasting blood glucose; SBP, systolic blood pressure; DBP, diastolic blood pressure; TC, total cholesterol; TG, plasma triglyceride; LDL-C, low-density lipoprotein-cholesterol; HDL-C, high-density lipoprotein-cholesterol.

\*ep, parameters that were free to be estimated; -2LL, negative log-likelihood; df, degrees of freedom; AIC, Akaike's Information Criteria, an alternative fit index. Lower values indicate better model fits; Δdf, the difference in degrees of freedom compared to the saturated model.

\*Saturated model, baseline models that estimate the variances and means separately for each twin in a pair and across zygosity; A, additive genetic variance; D, nonadditive genetic variance; C, common environmental variance; E, unique environmental variance.







| Model                | Comparison Model | ep | -2LL     | df   | AIC      | Δdf | P-values |
|----------------------|------------------|----|----------|------|----------|-----|----------|
| ACE                  | Saturated model  | 15 | 11534.49 | 4533 | 11564.49 | 17  | 0.01     |
| Drop c11             | ACE              | 14 | 11534.65 | 4534 | 11562.65 | 1   | 0.69     |
| Drop c22             | ACE              | 14 | 11545.12 | 4534 | 11573.12 | 1   | <0.01    |
| Drop c               | ACE              | 13 | 11545.42 | 4535 | 11571.42 | 2   | <0.01    |
| Drop c21             | ACE              | 13 | 11534.65 | 4535 | 11560.65 | 2   | 0.92     |
| <b>BMI&amp;TC</b>    |                  |    |          |      |          |     |          |
| ACE                  | Saturated model  | 17 | 11224.69 | 4379 | 11258.69 | 17  | 0.20     |
| Drop c11             | ACE              | 16 | 11224.72 | 4380 | 11256.72 | 1   | 0.86     |
| Drop c22             | ACE              | 16 | 11227.34 | 4380 | 11259.34 | 1   | 0.10     |
| Drop c               | ACE              | 15 | 11227.38 | 4381 | 11257.38 | 2   | 0.26     |
| Drop c21             | ACE              | 15 | 11224.72 | 4381 | 11254.72 | 2   | 0.98     |
| <b>BMI&amp;TG</b>    |                  |    |          |      |          |     |          |
| ACE                  | Saturated model  | 17 | 11008.35 | 4311 | 11042.35 | 17  | 0.71     |
| Drop c11             | ACE              | 16 | 11008.35 | 4312 | 11040.35 | 1   | 0.96     |
| Drop c22             | ACE              | 16 | 11009.36 | 4312 | 11041.36 | 1   | 0.31     |
| Drop c               | ACE              | 15 | 11009.38 | 4313 | 11039.38 | 2   | 0.60     |
| AE                   | ACE              | 15 | 11008.35 | 4313 | 11038.35 | 2   | 1.00     |
| <b>BMI&amp;LDL-C</b> |                  |    |          |      |          |     |          |
| ACE                  | Saturated model  | 17 | 11396.53 | 4391 | 11430.53 | 17  | 0.08     |
| Drop c11             | ACE              | 16 | 11396.55 | 4392 | 11428.55 | 1   | 0.88     |
| Drop c22             | ACE              | 16 | 11397.07 | 4392 | 11429.07 | 1   | 0.46     |
| Drop c               | ACE              | 15 | 11397.09 | 4393 | 11427.09 | 2   | 0.75     |
| AE                   | ACE              | 15 | 11396.55 | 4393 | 11426.55 | 2   | 0.99     |
| <b>BMI&amp;HDL-C</b> |                  |    |          |      |          |     |          |
| ACE                  | Saturated model  | 17 | 11073.07 | 4383 | 11107.07 | 17  | 0.62     |
| Drop c11             | ACE              | 16 | 11073.13 | 4384 | 11105.13 | 1   | 0.81     |
| Drop c22             | ACE              | 16 | 11077.28 | 4384 | 11109.28 | 1   | 0.04     |
| Drop c               | ACE              | 15 | 11077.28 | 4385 | 11107.28 | 2   | 0.12     |
| Drop c21             | ACE              | 15 | 11073.13 | 4385 | 11103.13 | 2   | 0.97     |

Abbreviations: BMI, body mass index; HbA1c, glycated hemoglobin; FBG, fasting blood glucose; SBP, systolic blood pressure; DBP, diastolic blood pressure; TC, total cholesterol; TG, plasma triglyceride; LDL-C, low-density lipoprotein-cholesterol; HDL-C, high-density lipoprotein-cholesterol.

\*ep, parameters that were free to be estimated; -2LL, negative log-likelihood; df, degrees of freedom; AIC, Akaike's Information Criteria, an alternative fit index. Lower values indicate better model fits; Δdf, the difference in degrees of freedom compared to the saturated model.

\*Saturated model, baseline models that estimate the variances and means separately for each twin in a pair and across zygosity; A, additive genetic variance; D, nonadditive genetic variance; C, common environmental variance; E,

**Supplementary Table S10 Genetic, and environmental correlations between BMI and cardiometabolic traits from the best-fitting bivariate models by sex**

Abbreviations: Ra, genetic correlations; Re, environmental correlations; BMI, body mass index; HbA1c, glycated hemoglobin; FBG, fasting blood glucose; SBP, systolic blood pressure; DBP, diastolic blood pressure; TC, total cholesterol; TG, plasma triglyceride; LDL-C, low-density lipoprotein-cholesterol; HDL-C, high-density lipoprotein-cholesterol.

**Supplementary Table S11 Assumptions testing of bivariate SEM for correlations between BMI and cardiometabolic risk factors by age group**

| Model                | ep | -2LL    | df   | AIC     | $\Delta$ df | P-values |
|----------------------|----|---------|------|---------|-------------|----------|
| <b>BMI&amp;HbA1c</b> |    |         |      |         |             |          |
| 18-50                |    |         |      |         |             |          |
| Saturated model      | 34 | 5591.58 | 2222 | 5659.58 |             |          |
| Submodel 1           | 30 | 5595.94 | 2226 | 5655.94 | 4           | 0.36     |
| Submodel 2           | 26 | 5603.16 | 2230 | 5655.16 | 8           | 0.17     |
| Submodel 3           | 22 | 5608.16 | 2234 | 5652.16 | 12          | 0.17     |
| 50-60                |    |         |      |         |             |          |
| Saturated model      | 34 | 2463.95 | 894  | 2531.95 |             |          |
| Submodel 1           | 30 | 2466.88 | 898  | 2526.88 | 4           | 0.57     |
| Submodel 2           | 26 | 2470.42 | 902  | 2522.42 | 8           | 0.60     |
| Submodel 3           | 22 | 2474.68 | 906  | 2518.68 | 12          | 0.55     |
| >60                  |    |         |      |         |             |          |
| Saturated model      | 34 | 1748.40 | 646  | 1816.40 |             |          |
| Submodel 1           | 30 | 1752.54 | 650  | 1812.54 | 4           | 0.39     |
| Submodel 2           | 26 | 1758.35 | 654  | 1810.35 | 8           | 0.27     |
| Submodel 3           | 22 | 1763.99 | 658  | 1807.99 | 12          | 0.21     |
| <b>BMI&amp;FBG</b>   |    |         |      |         |             |          |
| 18-50                |    |         |      |         |             |          |

| Model              | ep | -2LL    | df   | AIC     | Δdf | P-values |
|--------------------|----|---------|------|---------|-----|----------|
| Saturated model    | 34 | 6448.92 | 2498 | 6516.92 |     |          |
| Submodel 1         | 30 | 6452.85 | 2502 | 6512.85 | 4   | 0.41     |
| Submodel 2         | 26 | 6460.50 | 2506 | 6512.50 | 8   | 0.17     |
| Submodel 3         | 22 | 6471.46 | 2510 | 6515.46 | 12  | 0.03     |
| 50-60              |    |         |      |         |     |          |
| Saturated model    | 34 | 2663.66 | 994  | 2731.66 |     |          |
| Submodel 1         | 30 | 2667.35 | 998  | 2727.35 | 4   | 0.45     |
| Submodel 2         | 26 | 2672.62 | 1002 | 2724.62 | 8   | 0.35     |
| Submodel 3         | 22 | 2680.80 | 1006 | 2724.80 | 12  | 0.14     |
| >60                |    |         |      |         |     |          |
| Saturated model    | 34 | 1677.72 | 634  | 1745.72 |     |          |
| Submodel 1         | 30 | 1681.11 | 638  | 1741.11 | 4   | 0.49     |
| Submodel 2         | 26 | 1694.25 | 642  | 1746.25 | 8   | 0.04     |
| Submodel 3         | 22 | 1700.18 | 646  | 1744.18 | 12  | 0.03     |
| <b>BMI&amp;SBP</b> |    |         |      |         |     |          |
| 18-50              |    |         |      |         |     |          |
| Saturated model    | 32 | 6666.99 | 2628 | 6730.99 |     |          |
| Submodel 1         | 28 | 6670.53 | 2632 | 6726.53 | 4   | 0.47     |
| Submodel 2         | 24 | 6671.76 | 2636 | 6719.76 | 8   | 0.78     |
| Submodel 3         | 20 | 6681.68 | 2640 | 6721.68 | 12  | 0.26     |
| 50-60              |    |         |      |         |     |          |
| Saturated model    | 32 | 2901.72 | 1100 | 2965.72 |     |          |
| Submodel 1         | 28 | 2906.03 | 1104 | 2962.03 | 4   | 0.37     |
| Submodel 2         | 24 | 2906.41 | 1108 | 2954.41 | 8   | 0.79     |
| Submodel 3         | 20 | 2910.68 | 1112 | 2950.68 | 12  | 0.71     |
| >60                |    |         |      |         |     |          |
| Saturated model    | 32 | 1829.28 | 668  | 1893.28 |     |          |
| Submodel 1         | 28 | 1829.57 | 672  | 1885.57 | 4   | 0.99     |
| Submodel 2         | 24 | 1831.54 | 676  | 1879.54 | 8   | 0.97     |
| Submodel 3         | 20 | 1841.24 | 680  | 1881.24 | 12  | 0.45     |
| <b>BMI&amp;DBP</b> |    |         |      |         |     |          |
| 18-50              |    |         |      |         |     |          |
| Saturated model    | 32 | 6634.53 | 2624 | 6698.53 |     |          |
| Submodel 1         | 28 | 6637.57 | 2628 | 6693.57 | 4   | 0.55     |
| Submodel 2         | 24 | 6640.55 | 2632 | 6688.55 | 8   | 0.65     |
| Submodel 3         | 20 | 6651.49 | 2636 | 6691.49 | 12  | 0.15     |
| 50-60              |    |         |      |         |     |          |
| Saturated model    | 32 | 2979.04 | 1132 | 3043.04 |     |          |
| Submodel 1         | 28 | 2986.53 | 1136 | 3042.53 | 4   | 0.11     |
| Submodel 2         | 24 | 2989.47 | 1140 | 3037.47 | 8   | 0.24     |

| <b>Model</b>         | <b>ep</b> | <b>-2LL</b> | <b>df</b> | <b>AIC</b> | <b>Δdf</b> | <b>P-values</b> |
|----------------------|-----------|-------------|-----------|------------|------------|-----------------|
| Submodel 3           | 20        | 2993.55     | 1144      | 3033.55    | 12         | 0.27            |
| >60                  |           |             |           |            |            |                 |
| Saturated model      | 32        | 1869.06     | 696       | 1933.06    |            |                 |
| Submodel 1           | 28        | 1869.99     | 700       | 1925.99    | 4          | 0.92            |
| Submodel 2           | 24        | 1874.59     | 704       | 1922.59    | 8          | 0.70            |
| Submodel 3           | 20        | 1881.43     | 708       | 1921.43    | 12         | 0.42            |
| <b>BMI&amp;TC</b>    |           |             |           |            |            |                 |
| 18-50                |           |             |           |            |            |                 |
| Saturated model      | 34        | 6517.38     | 2550      | 6585.38    |            |                 |
| Submodel 1           | 30        | 6518.79     | 2554      | 6578.79    | 4          | 0.84            |
| Submodel 2           | 26        | 6520.35     | 2558      | 6572.35    | 8          | 0.94            |
| Submodel 3           | 22        | 6526.10     | 2562      | 6570.10    | 12         | 0.73            |
| 50-60                |           |             |           |            |            |                 |
| Saturated model      | 34        | 2866.37     | 1074      | 2934.37    |            |                 |
| Submodel 1           | 30        | 2869.38     | 1078      | 2929.38    | 4          | 0.56            |
| Submodel 2           | 26        | 2870.59     | 1082      | 2922.59    | 8          | 0.84            |
| Submodel 3           | 22        | 2878.67     | 1086      | 2922.67    | 12         | 0.42            |
| >60                  |           |             |           |            |            |                 |
| Saturated model      | 34        | 1800.45     | 670       | 1868.45    |            |                 |
| Submodel 1           | 30        | 1801.27     | 674       | 1861.27    | 4          | 0.94            |
| Submodel 2           | 26        | 1803.55     | 678       | 1855.55    | 8          | 0.93            |
| Submodel 3           | 22        | 1810.20     | 682       | 1854.20    | 12         | 0.64            |
| <b>BMI&amp;TG</b>    |           |             |           |            |            |                 |
| 18-50                |           |             |           |            |            |                 |
| Saturated model      | 34        | 6323.37     | 2494      | 6391.37    |            |                 |
| Submodel 1           | 30        | 6326.02     | 2498      | 6386.02    | 4          | 0.62            |
| Submodel 2           | 26        | 6328.00     | 2502      | 6380.00    | 8          | 0.80            |
| Submodel 3           | 22        | 6330.79     | 2506      | 6374.79    | 12         | 0.83            |
| 50-60                |           |             |           |            |            |                 |
| Saturated model      | 34        | 2855.77     | 1066      | 2923.77    |            |                 |
| Submodel 1           | 30        | 2864.27     | 1070      | 2924.27    | 4          | 0.08            |
| Submodel 2           | 26        | 2867.48     | 1074      | 2919.48    | 8          | 0.16            |
| Submodel 3           | 22        | 2876.79     | 1078      | 2920.79    | 12         | 0.05            |
| >60                  |           |             |           |            |            |                 |
| Saturated model      | 34        | 1799.56     | 666       | 1867.56    |            |                 |
| Submodel 1           | 30        | 1801.89     | 670       | 1861.89    | 4          | 0.68            |
| Submodel 2           | 26        | 1805.68     | 674       | 1857.68    | 8          | 0.63            |
| Submodel 3           | 22        | 1809.16     | 678       | 1853.16    | 12         | 0.65            |
| <b>BMI&amp;LDL-C</b> |           |             |           |            |            |                 |
| 18-50                |           |             |           |            |            |                 |

| Model                | ep | -2LL    | df   | AIC     | Δdf | P-values |
|----------------------|----|---------|------|---------|-----|----------|
| Saturated model      | 34 | 6636.84 | 2570 | 6704.84 |     |          |
| Submodel 1           | 30 | 6638.55 | 2574 | 6698.55 | 4   | 0.79     |
| Submodel 2           | 26 | 6649.29 | 2578 | 6701.29 | 8   | 0.13     |
| Submodel 3           | 22 | 6652.67 | 2582 | 6696.67 | 12  | 0.20     |
| 50-60                |    |         |      |         |     |          |
| Saturated model      | 34 | 2928.48 | 1078 | 2996.48 |     |          |
| Submodel 1           | 30 | 2931.46 | 1082 | 2991.46 | 4   | 0.56     |
| Submodel 2           | 26 | 2933.22 | 1086 | 2985.22 | 8   | 0.78     |
| Submodel 3           | 22 | 2936.47 | 1090 | 2980.47 | 12  | 0.79     |
| >60                  |    |         |      |         |     |          |
| Saturated model      | 34 | 1777.53 | 658  | 1845.53 |     |          |
| Submodel 1           | 30 | 1779.83 | 662  | 1839.83 | 4   | 0.68     |
| Submodel 2           | 26 | 1782.18 | 666  | 1834.18 | 8   | 0.79     |
| Submodel 3           | 22 | 1786.42 | 670  | 1830.42 | 12  | 0.71     |
| <b>BMI&amp;HDL-C</b> |    |         |      |         |     |          |
| 18-50                |    |         |      |         |     |          |
| Saturated model      | 34 | 6487.54 | 2558 | 6555.54 |     |          |
| Submodel 1           | 30 | 6489.19 | 2562 | 6549.19 | 4   | 0.80     |
| Submodel 2           | 26 | 6493.19 | 2566 | 6545.19 | 8   | 0.69     |
| Submodel 3           | 22 | 6497.40 | 2570 | 6541.40 | 12  | 0.63     |
| 50-60                |    |         |      |         |     |          |
| Saturated model      | 34 | 2846.00 | 1082 | 2914.00 |     |          |
| Submodel 1           | 30 | 2850.12 | 1086 | 2910.12 | 4   | 0.39     |
| Submodel 2           | 26 | 2850.84 | 1090 | 2902.84 | 8   | 0.77     |
| Submodel 3           | 22 | 2854.50 | 1094 | 2898.50 | 12  | 0.74     |
| >60                  |    |         |      |         |     |          |
| Saturated model      | 34 | 1719.16 | 658  | 1787.16 |     |          |
| Submodel 1           | 30 | 1720.84 | 662  | 1780.84 | 4   | 0.79     |
| Submodel 2           | 26 | 1723.58 | 666  | 1775.58 | 8   | 0.82     |
| Submodel 3           | 22 | 1729.53 | 670  | 1773.53 | 12  | 0.58     |

Abbreviations: BMI, body mass index; HbA1c, glycated hemoglobin; FBG, fasting blood glucose; SBP, systolic blood pressure; DBP, diastolic blood pressure; TC, total cholesterol; TG, plasma triglyceride; LDL-C, low-density lipoprotein-cholesterol; HDL-C, high-density lipoprotein-cholesterol.

\*ep, parameters that were free to be estimated; -2LL, negative log-likelihood; df, degrees of freedom; AIC, Akaike's Information Criteria, an alternative fit index. Lower values indicate better model fits; Δdf, the difference in degrees of freedom compared to the saturated model.

\*Saturated model, baseline models that estimate the variances and means separately for each twin in a pair and across zygosity; Submodel 1 equates means within twin pairs; Submodel 2 equates means and variance within twin pairs; Submodel 3 equates means and variances across zygosity.

**Supplementary Table S12 Bivariate SEM fits statistics for correlations between BMI and cardiometabolic risk factors by age group**

| Model                | Comparison Model | ep | -2LL    | df   | AIC     | $\Delta df$ | P-values |
|----------------------|------------------|----|---------|------|---------|-------------|----------|
| <b>BMI&amp;HbA1c</b> |                  |    |         |      |         |             |          |
| 18-50                |                  |    |         |      |         |             |          |
| ACE                  | Saturated model  | 17 | 5611.43 | 2239 | 5645.43 | 17          | 0.28     |
| Drop c11             | ACE              | 16 | 5611.43 | 2240 | 5643.43 | 1           | 0.98     |
| Drop c22             | ACE              | 16 | 5614.17 | 2240 | 5646.17 | 1           | 0.10     |
| Drop c               | ACE              | 15 | 5614.17 | 2241 | 5644.17 | 2           | 0.25     |
| Drop c21             | ACE              | 15 | 5611.43 | 2241 | 5641.43 | 2           | 1.00     |
| 50-60                |                  |    |         |      |         |             |          |
| ACE                  | Saturated model  | 17 | 2482.57 | 911  | 2516.57 | 17          | 0.35     |
| Drop c11             | ACE              | 16 | 2482.57 | 912  | 2514.57 | 1           | 1.00     |
| Drop c22             | ACE              | 16 | 2486.19 | 912  | 2518.19 | 1           | 0.06     |
| Drop c               | ACE              | 15 | 2486.19 | 913  | 2516.19 | 2           | 0.16     |
| AE                   | ACE              | 14 | 2486.19 | 914  | 2514.19 | 3           | 0.31     |
| Hom                  | AE               | 13 | 2499.52 | 915  | 2525.52 | 2           | <0.01    |
| >60                  |                  |    |         |      |         |             |          |
| ACE                  | Saturated model  | 17 | 1769.75 | 663  | 1803.75 | 17          | 0.21     |
| Drop c11             | ACE              | 16 | 1770.10 | 664  | 1802.10 | 1           | 0.55     |
| Drop c22             | ACE              | 16 | 1771.24 | 664  | 1803.24 | 1           | 0.22     |
| Drop c               | ACE              | 15 | 1771.48 | 665  | 1801.48 | 2           | 0.42     |
| AE                   | ACE              | 14 | 1771.48 | 666  | 1799.48 | 3           | 0.63     |
| Hom                  | AE               | 13 | 1774.72 | 667  | 1800.72 | 2           | 0.09     |
| <b>BMI&amp;FBG</b>   |                  |    |         |      |         |             |          |
| 18-50                |                  |    |         |      |         |             |          |
| ACE                  | Saturated model  | 17 | 6473.97 | 2515 | 6507.97 | 17          | 0.09     |
| Drop c11             | ACE              | 16 | 6474.49 | 2516 | 6506.49 | 1           | 0.47     |
| Drop c22             | ACE              | 16 | 6476.87 | 2516 | 6508.87 | 1           | 0.09     |
| Drop c               | ACE              | 15 | 6477.48 | 2517 | 6507.48 | 2           | 0.17     |
| Drop c21             | ACE              | 15 | 6474.49 | 2517 | 6504.49 | 2           | 0.77     |
| 50-60                |                  |    |         |      |         |             |          |
| ACE                  | Saturated model  | 17 | 2690.32 | 1011 | 2724.32 | 17          | 0.06     |
| Drop c11             | ACE              | 16 | 2690.32 | 1012 | 2722.32 | 1           | 1.00     |
| Drop c22             | ACE              | 16 | 2691.75 | 1012 | 2723.75 | 1           | 0.23     |
| Drop c               | ACE              | 15 | 2691.75 | 1013 | 2721.75 | 2           | 0.49     |
| AE                   | ACE              | 14 | 2691.75 | 1014 | 2719.75 | 3           | 0.70     |

| Model              | Comparison Model | ep | -2LL    | df   | AIC     | $\Delta df$ | P-values |
|--------------------|------------------|----|---------|------|---------|-------------|----------|
| Hom >60            | AE               | 13 | 2715.12 | 1015 | 2741.12 | 2           | <0.01    |
| ACE                | Saturated model  | 17 | 1712.04 | 651  | 1746.04 | 17          | 0.01     |
| Drop c11           | ACE              | 16 | 1712.16 | 652  | 1744.16 | 1           | 0.73     |
| Drop c22           | ACE              | 16 | 1712.04 | 652  | 1744.04 | 1           | 1.00     |
| Drop c             | ACE              | 15 | 1712.16 | 653  | 1742.16 | 2           | 0.94     |
| AE                 | ACE              | 14 | 1712.16 | 654  | 1740.16 | 3           | 0.99     |
| Hom                | AE               | 13 | 1725.58 | 655  | 1751.58 | 2           | <0.01    |
| <b>BMI&amp;SBP</b> |                  |    |         |      |         |             |          |
| 18-50              |                  |    |         |      |         |             |          |
| ACE                | Saturated model  | 15 | 6685.96 | 2645 | 6715.96 | 17          | 0.33     |
| Drop c11           | ACE              | 14 | 6686.42 | 2646 | 6714.42 | 1           | 0.50     |
| Drop c22           | ACE              | 14 | 6689.66 | 2646 | 6717.66 | 1           | 0.05     |
| Drop c             | ACE              | 13 | 6690.34 | 2647 | 6716.34 | 2           | 0.11     |
| Drop c21           | ACE              | 13 | 6686.42 | 2647 | 6712.42 | 2           | 0.79     |
| 50-60              |                  |    |         |      |         |             |          |
| ACE                | Saturated model  | 15 | 2913.23 | 1117 | 2943.23 | 17          | 0.83     |
| Drop c11           | ACE              | 14 | 2913.23 | 1118 | 2941.23 | 1           | 1.00     |
| Drop c22           | ACE              | 14 | 2913.97 | 1118 | 2941.97 | 1           | 0.39     |
| Drop c             | ACE              | 13 | 2913.97 | 1119 | 2939.97 | 2           | 0.69     |
| AE                 | ACE              | 12 | 2913.97 | 1120 | 2937.97 | 3           | 0.87     |
| Hom                | AE               | 11 | 2948.53 | 1121 | 2970.53 | 1           | <0.01    |
| >60                |                  |    |         |      |         |             |          |
| ACE                | Saturated model  | 15 | 1844.61 | 685  | 1874.61 | 17          | 0.57     |
| Drop c11           | ACE              | 14 | 1844.61 | 686  | 1872.61 | 1           | 1.00     |
| Drop c22           | ACE              | 14 | 1847.24 | 686  | 1875.24 | 1           | 0.11     |
| Drop c             | ACE              | 13 | 1847.24 | 687  | 1873.24 | 2           | 0.27     |
| AE                 | ACE              | 12 | 1847.24 | 688  | 1871.24 | 3           | 0.45     |
| Hom                | AE               | 11 | 1853.64 | 689  | 1875.64 | 1           | 0.01     |
| <b>BMI&amp;DBP</b> |                  |    |         |      |         |             |          |
| 18-50              |                  |    |         |      |         |             |          |
| ACE                | Saturated model  | 15 | 6657.50 | 2641 | 6687.50 | 17          | 0.15     |
| Drop c11           | ACE              | 14 | 6658.03 | 2642 | 6686.03 | 1           | 0.47     |
| Drop c22           | ACE              | 14 | 6661.71 | 2642 | 6689.71 | 1           | 0.04     |
| Drop c             | ACE              | 13 | 6662.58 | 2643 | 6688.58 | 2           | 0.08     |
| Drop c21           | ACE              | 13 | 6658.03 | 2643 | 6684.03 | 2           | 0.77     |
| 50-60              |                  |    |         |      |         |             |          |
| ACE                | Saturated model  | 15 | 2995.97 | 1149 | 3025.97 | 17          | 0.46     |
| Drop c11           | ACE              | 14 | 2996.15 | 1150 | 3024.15 | 1           | 0.67     |
| Drop c22           | ACE              | 14 | 2999.23 | 1150 | 3027.23 | 1           | 0.07     |
| Drop c             | ACE              | 13 | 2999.23 | 1151 | 3025.23 | 2           | 0.20     |
| AE                 | ACE              | 12 | 2999.23 | 1152 | 3023.23 | 3           | 0.35     |



| Model             | Comparison Model | ep | -2LL    | df   | AIC     | Δdf | P-values |
|-------------------|------------------|----|---------|------|---------|-----|----------|
| Hom >60           | AE               | 11 | 3026.40 | 1153 | 3048.40 | 1   | <0.01    |
| ACE               | Saturated model  | 15 | 1884.49 | 713  | 1914.49 | 17  | 0.56     |
| Drop c11          | ACE              | 14 | 1884.49 | 714  | 1912.49 | 1   | 1.00     |
| Drop c22          | ACE              | 14 | 1884.83 | 714  | 1912.83 | 1   | 0.56     |
| Drop c            | ACE              | 13 | 1884.83 | 715  | 1910.83 | 2   | 0.84     |
| AE                | ACE              | 12 | 1884.83 | 716  | 1908.83 | 3   | 0.95     |
| Hom               | AE               | 11 | 1896.31 | 717  | 1918.31 | 1   | <0.01    |
| <b>BMI&amp;TC</b> |                  |    |         |      |         |     |          |
| 18-50             |                  |    |         |      |         |     |          |
| ACE               | Saturated model  | 17 | 6530.78 | 2567 | 6564.78 | 17  | 0.71     |
| Drop c11          | ACE              | 16 | 6530.88 | 2568 | 6562.88 | 1   | 0.76     |
| Drop c22          | ACE              | 16 | 6531.01 | 2568 | 6563.01 | 1   | 0.63     |
| Drop c            | ACE              | 15 | 6531.11 | 2569 | 6561.11 | 2   | 0.85     |
| AE                | ACE              | 14 | 6531.11 | 2570 | 6559.11 | 3   | 0.96     |
| 50-60             |                  |    |         |      |         |     |          |
| ACE               | Saturated model  | 17 | 2881.95 | 1091 | 2915.95 | 17  | 0.55     |
| Drop c11          | ACE              | 16 | 2881.95 | 1092 | 2913.95 | 1   | 1.00     |
| Drop c22          | ACE              | 16 | 2885.57 | 1092 | 2917.57 | 1   | 0.06     |
| Drop c            | ACE              | 15 | 2885.57 | 1093 | 2915.57 | 2   | 0.16     |
| AE                | ACE              | 14 | 2885.57 | 1094 | 2913.57 | 3   | 0.31     |
| Hom               | AE               | 13 | 2909.71 | 1095 | 2935.71 | 2   | <0.01    |
| >60               |                  |    |         |      |         |     |          |
| ACE               | Saturated model  | 17 | 1823.86 | 687  | 1857.86 | 17  | 0.14     |
| Drop c11          | ACE              | 16 | 1823.86 | 688  | 1855.86 | 1   | 1.00     |
| Drop c22          | ACE              | 16 | 1823.98 | 688  | 1855.98 | 1   | 0.73     |
| Drop c            | ACE              | 15 | 1823.98 | 689  | 1853.98 | 2   | 0.94     |
| AE                | ACE              | 14 | 1823.98 | 690  | 1851.98 | 3   | 0.99     |
| Hom               | AE               | 13 | 1837.01 | 691  | 1863.01 | 2   | <0.01    |
| <b>BMI&amp;TG</b> |                  |    |         |      |         |     |          |
| 18-50             |                  |    |         |      |         |     |          |
| ACE               | Saturated model  | 17 | 6334.03 | 2511 | 6368.03 | 17  | 0.87     |
| Drop c11          | ACE              | 16 | 6334.17 | 2512 | 6366.17 | 1   | 0.71     |
| Drop c22          | ACE              | 16 | 6336.35 | 2512 | 6368.35 | 1   | 0.13     |
| Drop c            | ACE              | 15 | 6336.65 | 2513 | 6366.65 | 2   | 0.27     |
| Drop c21          | ACE              | 15 | 6334.17 | 2513 | 6364.17 | 2   | 0.93     |
| 50-60             |                  |    |         |      |         |     |          |
| ACE               | Saturated model  | 17 | 2880.77 | 1083 | 2914.77 | 17  | 0.09     |
| Drop c11          | ACE              | 16 | 2880.77 | 1084 | 2912.77 | 1   | 1.00     |
| Drop c22          | ACE              | 16 | 2880.77 | 1084 | 2912.77 | 1   | 1.00     |
| Drop c            | ACE              | 15 | 2880.77 | 1085 | 2910.77 | 2   | 1.00     |
| AE                | ACE              | 14 | 2880.77 | 1086 | 2908.77 | 3   | 1.00     |

| Model                | Comparison Model | ep | -2LL    | df   | AIC     | $\Delta df$ | P-values |
|----------------------|------------------|----|---------|------|---------|-------------|----------|
| Hom >60              | AE               | 13 | 2915.16 | 1087 | 2941.16 | 2           | <0.01    |
| ACE                  | Saturated model  | 17 | 1812.62 | 683  | 1846.62 | 17          | 0.73     |
| Drop c11             | ACE              | 16 | 1812.62 | 684  | 1844.62 | 1           | 1.00     |
| Drop c22             | ACE              | 16 | 1812.80 | 684  | 1844.80 | 1           | 0.68     |
| Drop c               | ACE              | 15 | 1812.80 | 685  | 1842.80 | 2           | 0.92     |
| AE                   | ACE              | 14 | 1812.80 | 686  | 1840.80 | 3           | 0.98     |
| Hom                  | AE               | 13 | 1824.63 | 687  | 1850.63 | 2           | <0.01    |
| <b>BMI&amp;LDL-C</b> |                  |    |         |      |         |             |          |
| 18-50                |                  |    |         |      |         |             |          |
| ACE                  | Saturated model  | 17 | 6660.79 | 2587 | 6694.79 | 17          | 0.12     |
| Drop c11             | ACE              | 16 | 6660.84 | 2588 | 6692.84 | 1           | 0.83     |
| Drop c22             | ACE              | 16 | 6660.79 | 2588 | 6692.79 | 1           | 1.00     |
| Drop c               | ACE              | 15 | 6660.84 | 2589 | 6690.84 | 2           | 0.98     |
| AE                   | ACE              | 14 | 6660.84 | 2590 | 6688.84 | 3           | 1.00     |
| 50-60                |                  |    |         |      |         |             |          |
| ACE                  | Saturated model  | 17 | 2940.81 | 1095 | 2974.81 | 17          | 0.78     |
| Drop c11             | ACE              | 16 | 2940.81 | 1096 | 2972.81 | 1           | 1.00     |
| Drop c22             | ACE              | 16 | 2944.95 | 1096 | 2976.95 | 1           | 0.04     |
| Drop c               | ACE              | 15 | 2944.95 | 1097 | 2974.95 | 2           | 0.13     |
| AE                   | ACE              | 14 | 2944.95 | 1098 | 2972.95 | 3           | 0.25     |
| Hom                  | AE               | 13 | 2963.55 | 1099 | 2989.55 | 2           | <0.01    |
| >60                  |                  |    |         |      |         |             |          |
| ACE                  | Saturated model  | 17 | 1800.41 | 675  | 1834.41 | 17          | 0.15     |
| Drop c11             | ACE              | 16 | 1800.41 | 676  | 1832.41 | 1           | 1.00     |
| Drop c22             | ACE              | 16 | 1800.96 | 676  | 1832.96 | 1           | 0.46     |
| Drop c               | ACE              | 15 | 1800.96 | 677  | 1830.96 | 2           | 0.76     |
| AE                   | ACE              | 14 | 1800.96 | 678  | 1828.96 | 3           | 0.91     |
| Hom                  | AE               | 13 | 1812.21 | 679  | 1838.21 | 2           | <0.01    |
| <b>BMI&amp;HDL-C</b> |                  |    |         |      |         |             |          |
| 18-50                |                  |    |         |      |         |             |          |
| ACE                  | Saturated model  | 17 | 6503.67 | 2575 | 6537.67 | 17          | 0.51     |
| Drop c11             | ACE              | 16 | 6504.11 | 2576 | 6536.11 | 1           | 0.51     |
| Drop c22             | ACE              | 16 | 6506.03 | 2576 | 6538.03 | 1           | 0.12     |
| Drop c               | ACE              | 15 | 6506.03 | 2577 | 6536.03 | 2           | 0.31     |
| AE                   | ACE              | 14 | 6506.03 | 2578 | 6534.03 | 3           | 0.50     |
| 50-60                |                  |    |         |      |         |             |          |
| ACE                  | Saturated model  | 17 | 2865.45 | 1099 | 2899.45 | 17          | 0.30     |
| Drop c11             | ACE              | 16 | 2865.45 | 1100 | 2897.45 | 1           | 1.00     |
| Drop c22             | ACE              | 16 | 2868.49 | 1100 | 2900.49 | 1           | 0.08     |
| Drop c               | ACE              | 15 | 2868.49 | 1101 | 2898.49 | 2           | 0.22     |
| AE                   | ACE              | 14 | 2868.49 | 1102 | 2896.49 | 3           | 0.38     |

| Model    | Comparison Model | ep | -2LL    | df   | AIC     | $\Delta df$ | P-values |
|----------|------------------|----|---------|------|---------|-------------|----------|
| Hom      | AE               | 13 | 2895.10 | 1103 | 2921.10 | 2           | <0.01    |
| >60      |                  |    |         |      |         |             |          |
| ACE      | Saturated model  | 17 | 1733.36 | 675  | 1767.36 | 17          | 0.65     |
| Drop c11 | ACE              | 16 | 1733.36 | 676  | 1765.36 | 1           | 1.00     |
| Drop c22 | ACE              | 16 | 1733.36 | 676  | 1765.36 | 1           | 1.00     |
| Drop c   | ACE              | 15 | 1733.36 | 677  | 1763.36 | 2           | 1.00     |
| AE       | ACE              | 14 | 1733.36 | 678  | 1761.36 | 3           | 1.00     |
| Hom      | AE               | 13 | 1754.58 | 679  | 1780.58 | 2           | <0.01    |

Abbreviations: BMI, body mass index; HbA1c, glycated hemoglobin; FBG, fasting blood glucose; SBP, systolic blood pressure; DBP, diastolic blood pressure; TC, total cholesterol; TG, plasma triglyceride; LDL-C, low-density lipoprotein-cholesterol; HDL-C, high-density lipoprotein-cholesterol.

\*ep, parameters that were free to be estimated; -2LL, negative log-likelihood; df, degrees of freedom; AIC, Akaike's Information Criteria, an alternative fit index. Lower values indicate better model fits;  $\Delta df$ , the difference in degrees of freedom compared to the saturated model.

\*Saturated model, baseline models that estimate the variances and means separately for each twin in a pair and across zygosity; A, additive genetic variance; D, nonadditive genetic variance; C, common environmental variance; E, unique environmental variance; Hom, homogeneity model, which equates the variance components across age groups.

**Supplementary Table S13 Phenotypic, Genetic, and unique environmental correlations between BMI and cardiometabolic risk factors by age group**

|                      | Rph             | Ra               | Re              |
|----------------------|-----------------|------------------|-----------------|
| <b>BMI&amp;HbA1c</b> |                 |                  |                 |
| 18-50                | 0.23(0.16,0.29) | 0.29(0.18,0.42)  | 0.12(0.05,0.22) |
| 50-60                | 0.07(0.01,0.17) | 0.01(0.00,0.20)  | 0.15(0.00,0.28) |
| >60                  | 0.22(0.11,0.33) | 0.14(0.00,0.34)  | 0.33(0.17,0.47) |
| <b>BMI&amp;FBG</b>   |                 |                  |                 |
| 18-50                | 0.23(0.17,0.29) | 0.33(0.20,0.55)  | 0.13(0.06,0.22) |
| 50-60                | 0.09(0.01,0.19) | 0.08(0.00,0.23)  | 0.12(0.00,0.26) |
| >60                  | 0.23(0.13,0.34) | 0.09(0.00,0.29)  | 0.42(0.27,0.55) |
| <b>BMI&amp;SBP</b>   |                 |                  |                 |
| 18-50                | 0.32(0.26,0.37) | 0.44(0.32,0.60)  | 0.17(0.10,0.26) |
| 50-60                | 0.24(0.15,0.32) | 0.23(0.08,0.37)  | 0.26(0.13,0.38) |
| >60                  | 0.16(0.07,0.27) | 0.08(0.00, 0.30) | 0.26(0.11,0.40) |
| <b>BMI&amp;DBP</b>   |                 |                  |                 |
| 18-50                | 0.36(0.30,0.41) | 0.49(0.36,0.68)  | 0.22(0.15,0.31) |
| 50-60                | 0.28(0.19,0.36) | 0.31(0.16,0.44)  | 0.23(0.10,0.35) |
| >60                  | 0.10(0.04,0.20) | 0.00(0.00,0.17)  | 0.25(0.10,0.38) |
| <b>BMI&amp;TC</b>    |                 |                  |                 |
| 18-50                | 0.19(0.13,0.25) | 0.20(0.11,0.29)  | 0.18(0.09,0.26) |

|                      | <b>Rph</b>         | <b>Ra</b>          | <b>Re</b>          |
|----------------------|--------------------|--------------------|--------------------|
| 50-60                | 0.14(0.05,0.23)    | 0.09(0.00,0.24)    | 0.22(0.09,0.35)    |
| >60                  | 0.04(0.00,0.16)    | 0.07(0.00,0.25)    | 0.00(0.00,0.16)    |
| <b>BMI&amp;TG</b>    |                    |                    |                    |
| 18-50                | 0.35(0.29,0.41)    | 0.39(0.27,0.54)    | 0.33(0.25,0.45)    |
| 50-60                | 0.29(0.20,0.37)    | 0.32(0.16,0.47)    | 0.26(0.12,0.38)    |
| >60                  | 0.29(0.18,0.39)    | 0.30(0.09,0.49)    | 0.28(0.12,0.42)    |
| <b>BMI&amp;LDL-C</b> |                    |                    |                    |
| 18-50                | 0.15(0.09,0.21)    | 0.16(0.06,0.25)    | 0.15(0.06,0.24)    |
| 50-60                | 0.11(0.04,0.20)    | 0.04(0.00,0.21)    | 0.20(0.07,0.33)    |
| >60                  | 0.11(0.00,0.22)    | 0.14(0.00,0.34)    | 0.05(0.00,0.22)    |
| <b>BMI&amp;HDL-C</b> |                    |                    |                    |
| 18-50                | -0.28(-0.34,-0.22) | -0.30(-0.38,-0.22) | -0.21(-0.30,-0.13) |
| 50-60                | -0.21(-0.30,-0.11) | -0.25(-0.39,-0.11) | -0.11(-0.24, 0.00) |
| >60                  | -0.22(-0.34,-0.11) | -0.21(-0.39,-0.02) | -0.25(-0.40,-0.09) |

Abbreviations: Rph, phenotypic correlations; Ra, genetic correlations; Re, environmental correlations; BMI, body mass index; HbA1c, glycated hemoglobin; FBG, fasting blood glucose; SBP, systolic blood pressure; DBP, diastolic blood pressure; TC, total cholesterol; TG, plasma triglyceride; LDL-C, low-density lipoprotein-cholesterol; HDL-C, high-density lipoprotein-cholesterol.
